# Supplementary material
Source: PubMed Central journal article supplement (PMC6201285)
Supplement: NIHMS963451-supplement-Supp_FigS2.pdf [file NIHMS963451-supplement-Supp_FigS2.pdf]

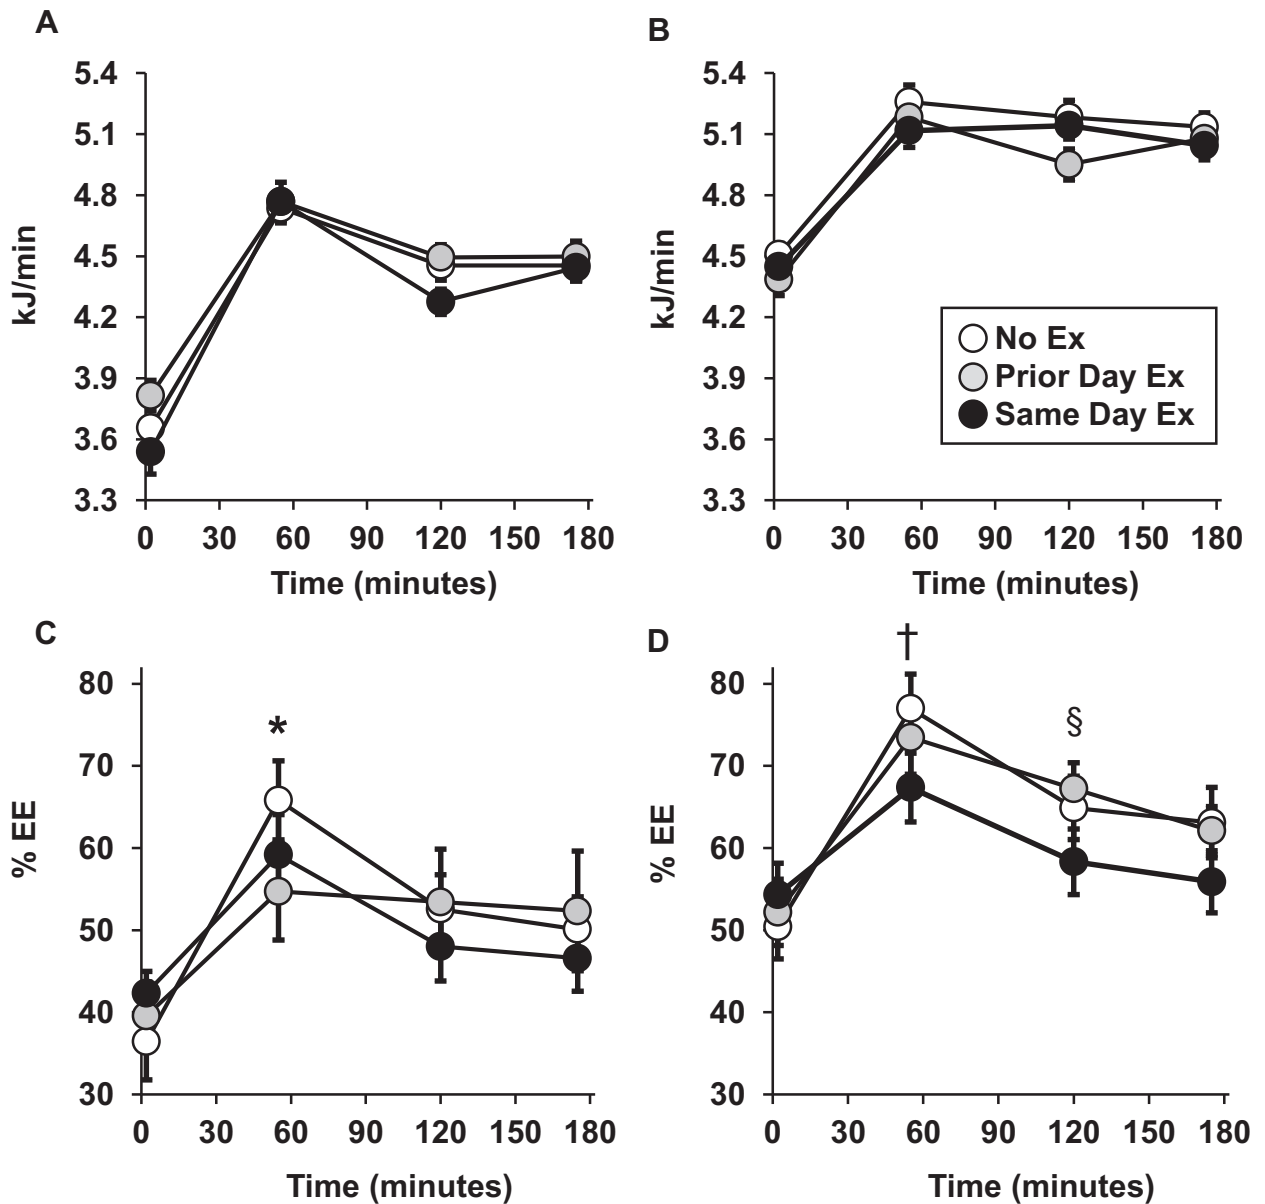

**Support Figure 2:** Energy expenditure (EE) and carbohydrate oxidation. Panels A (NW group) and B (OW/Ob group) show the EE curves from the pre-meal baseline (Time 0 minutes) through the postprandial period (50-180 minutes). Panels C (NW group) and D (OW/Ob group) show carbohydrate oxidation rate, expressed as a percentage of EE, respectively. All values shown as mean  $\pm$  SEM. The legend applies to all panels. \*Prior Day Ex versus No Ex within group,  $p < 0.05$ . † Same Day Ex versus No Ex within group,  $p < 0.05$ ; § Prior Day Ex versus Same Day Ex within group,  $p < 0.05$ .
